# Supplementary material
Source: Springer Nature journal article supplement (http://www.springermedizin.de/resource/supplementary/12955_2004_238_MOESM1_ESM.pdf/9560042)
Supplement: MOESM1 [file 9560042]

Literature review

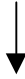

Preliminary pool of questions

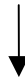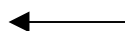

**Face and content validity study**

Revised pool of questions

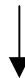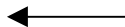

**Item impact study**

Final questions for  
CPQ<sub>11-14</sub>

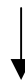

**Validity and reliability study**
